# Supplementary material for: All-solution processed high performance inverted quantum dot light emitting diodes
Source: Royal Society of Chemistry journal article supplement (doi:10.1039/c9tc06850c), 2020-01-01
Supplement: c9tc06850c1.pdf [file c9tc06850c1.pdf]

## **Supporting Information**

### **All-solution Processed High Performance Inverted Quantum Dot Light Emitting Diodes**

Yangke Cun, Chaohuang Mai, Yu Luo, Lan Mu, Jiali Li, Lijuan Cao, Danmu Yu,  
Miaozi Li, Binbin Zhang, Haihua Li, and Jian Wang\*

Institute of Polymer Optoelectronic Materials and Devices, State Key Laboratory of  
Luminescent Materials and Devices, South China University of Technology,  
Guangzhou 510640, China.

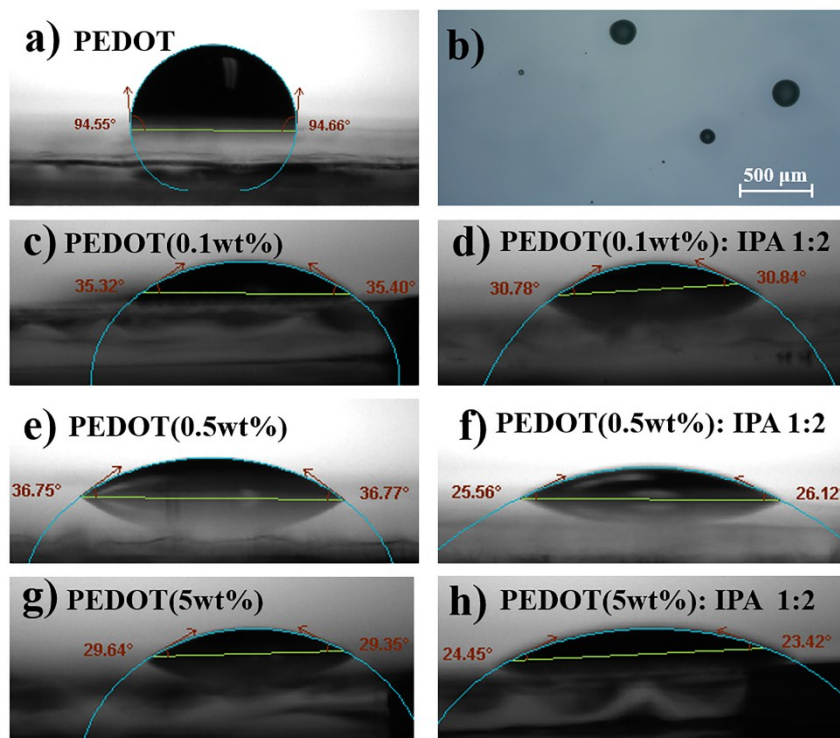

**Figure S1.** a); c)-h) contact angle images of different PEDOT; b) The micrograph of PEDOT on PVK.

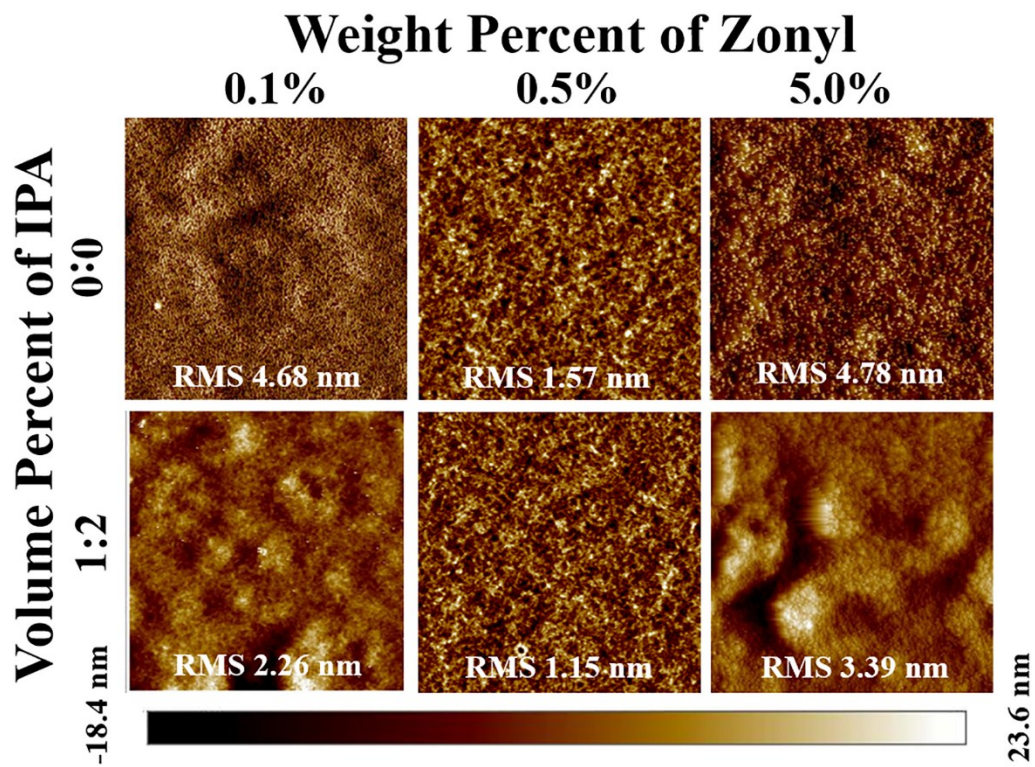

Figure S2. The AFM images of difference PEDOT.

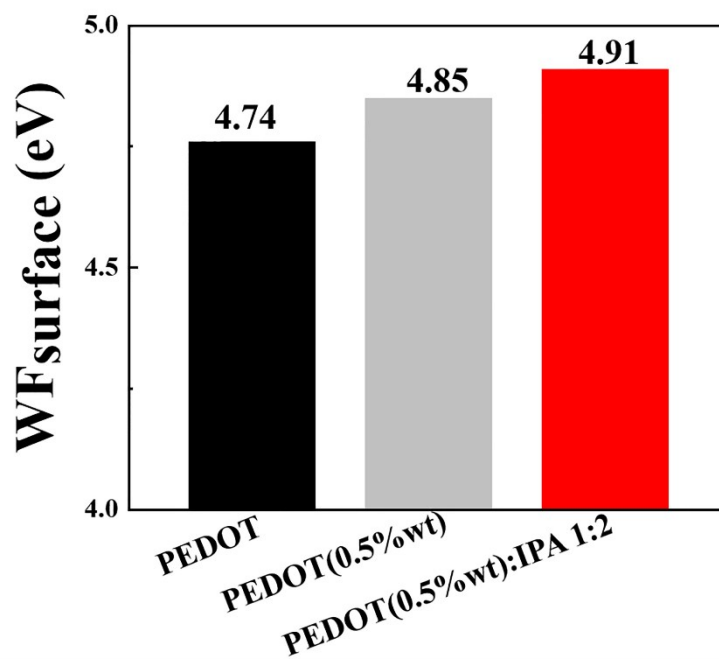

Figure S3. The work function of different PEDOT:PSS.

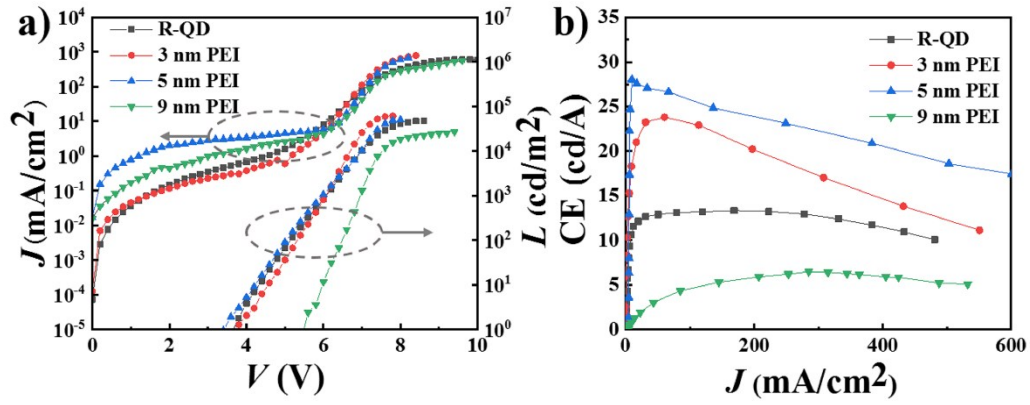

**Figure S4.** a)  $J$ - $V$ - $L$  characteristics. b) The dependence of CE on the current density of R-QLED with difference thickness PEI.

**Table S1.** Device performance of R-QLED with difference thickness PEI.

| Devices  | Voltage (V) |              | Current efficiency (cd/A) | EQE (%) | Luminance (cd/m <sup>2</sup> ) |
|----------|-------------|--------------|---------------------------|---------|--------------------------------|
|          | $V_T$       | at $L_{max}$ | max                       | max     | max                            |
| w/o PEI  | 3.8         | 8.6          | 13.4                      | 9.78    | $4.84 \times 10^4$             |
| 3 nm PEI | 3.6         | 8.2          | 23.8                      | 17.5    | $5.92 \times 10^4$             |
| 5 nm PEI | 3.4         | 8.0          | 28.1                      | 20.6    | $5.06 \times 10^4$             |
| 9 nm PEI | 5.4         | 9.8          | 6.5                       | 4.77    | $2.69 \times 10^4$             |

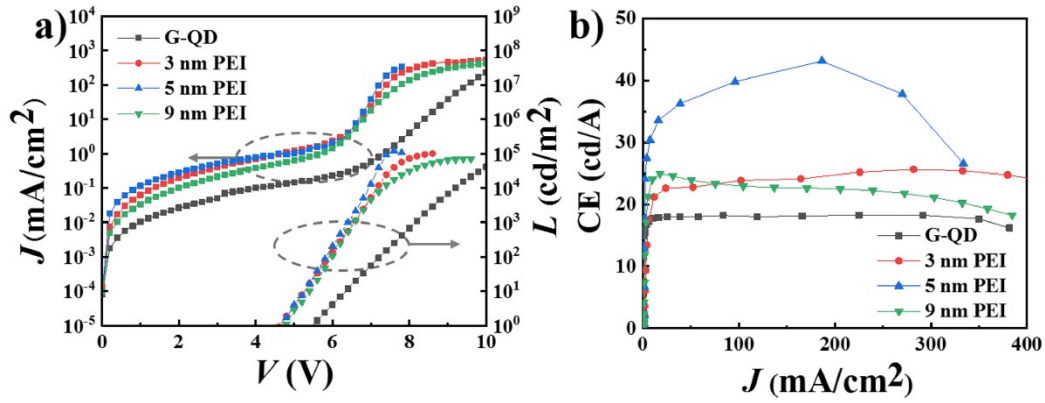

**Figure S5.** a)  $J$ - $V$ - $L$  characteristics. b) The dependence of CE on the current density of G-QLED with difference thickness PEI.

**Table S2.** Device performance of G-QLED with difference thickness PEI.

| Devices  | Voltage (V) |              | Current efficiency (cd/A) | EQE (%) | Luminance (cd/m <sup>2</sup> ) |
|----------|-------------|--------------|---------------------------|---------|--------------------------------|
|          | $V_T$       | at $L_{max}$ | max                       | max     | max                            |
|          | w/o PEI     | 5.4          | 10.6                      | 18.2    | 4.55                           |
| 3 nm PEI | 4.6         | 8.6          | 25.6                      | 6.17    | $10.0 \times 10^4$             |
| 5 nm PEI | 4.6         | 7.2          | 43.1                      | 10.4    | $1.21 \times 10^5$             |
| 9 nm PEI | 4.8         | 9.6          | 22.7                      | 5.48    | $7.00 \times 10^4$             |

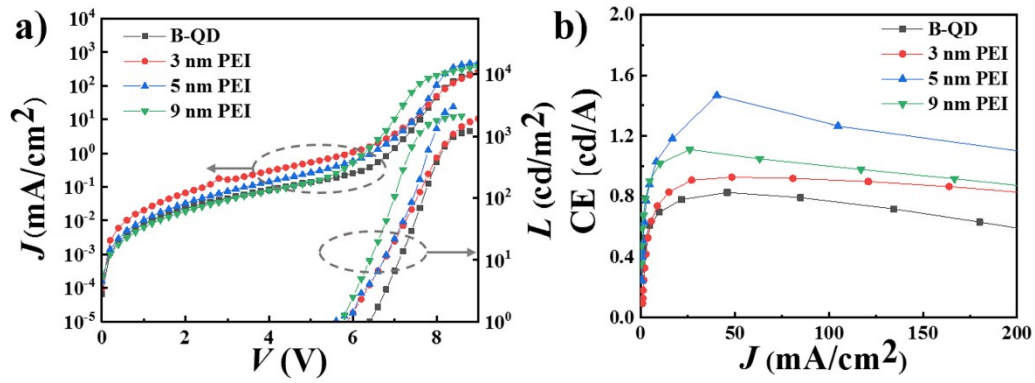

**Figure S6.** a)  $J$ - $V$ - $L$  characteristics. b) The dependence of CE on the current density of B-QLED with difference thickness PEI.

**Table S3.** Device performance of B-QLED with difference thickness PEI.

| Devices  | Voltage (V) |              | Current efficiency (cd/A) | EQE (%) | Luminance (cd/m <sup>2</sup> ) |
|----------|-------------|--------------|---------------------------|---------|--------------------------------|
|          | $V_T$       | at $L_{max}$ | max                       | max     | max                            |
| w/o PEI  | 6.4         | 8.8          | 0.82                      | 1.70    | $1.20 \times 10^3$             |
| 3 nm PEI | 5.8         | 9.4          | 0.93                      | 1.93    | $2.07 \times 10^3$             |
| 5 nm PEI | 5.6         | 8.4          | 1.42                      | 2.95    | $2.96 \times 10^3$             |
| 9 nm PEI | 5.8         | 8.6          | 1.11                      | 2.31    | $2.10 \times 10^3$             |

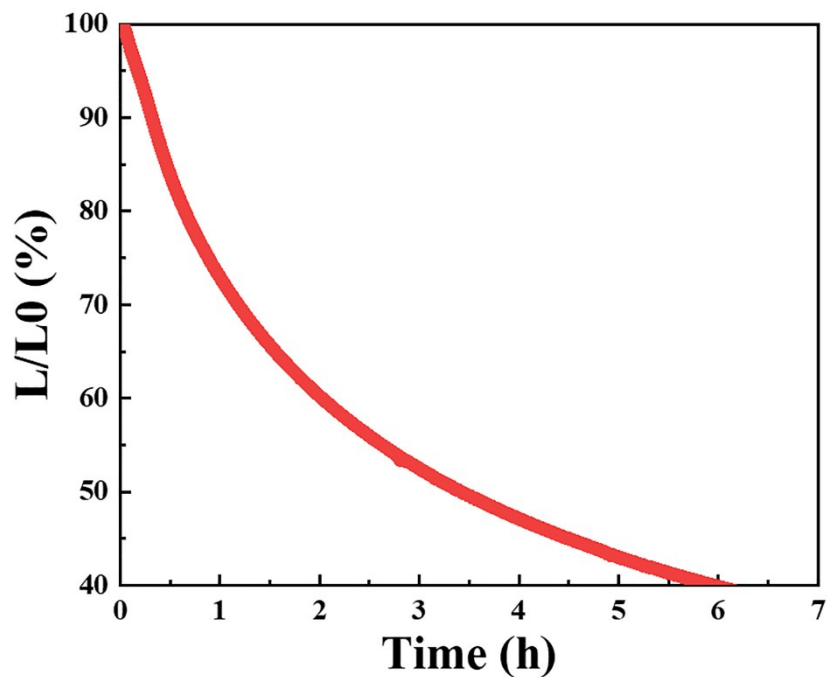

**Figure S7.** Stability data for R-QLED device. The initial brightness of pristine R-QLED device is 5956 cd/m<sup>2</sup>. The initial brightness of R-QLED device with 5 nm PEI is 7440 cd/m<sup>2</sup>.

**Table S4.** Multi-exponential fitting parameters for PL decays of QD with various thickness PEI.

| PEI thickness (nm) | A <sub>1</sub> (%) | τ <sub>1</sub> (ns) | A <sub>2</sub> (%) | τ <sub>2</sub> (ns) | A <sub>3</sub> (%) | τ <sub>3</sub> (ns) | τ <sub>ave</sub> (ns) |
|--------------------|--------------------|---------------------|--------------------|---------------------|--------------------|---------------------|-----------------------|
| 0                  | 4.4                | 44.6                | 65.8               | 9.23                | 29.8               | 4.46                | 9.37                  |
| 3                  | 7.2                | 47.2                | 67.2               | 8.49                | 25.6               | 3.37                | 9.98                  |
| 5                  | 9.2                | 47.9                | 64.9               | 8.15                | 25.9               | 2.91                | 10.4                  |
| 9                  | 9.4                | 55.9                | 60.4               | 8.66                | 30.2               | 3.33                | 11.4                  |
